# Supplementary material for: Hydrothermal syntheses, crystal structures and magnetic properties of four Mn(ii) and Co(ii) coordination polymers generated from new carboxylate-introduced 1,2,3-triazole ligands
Source: Royal Society of Chemistry journal article supplement (doi:10.1039/c1ce05208j), 2011-01-01
Supplement: c1ce05208j.pdf [file c1ce05208j.pdf]

## Electronic Supplementary Information (ESI)

### **Hydrothermal syntheses, crystal structures and magnetic properties of four Mn(II) and Co(II) coordination polymers generated from new carboxylate-introduced 1,2,3-triazole ligands**

Yan Li,<sup>ab</sup> Wen-Qiang Zou,<sup>a</sup> Mei-Feng Wu,<sup>a</sup> Jian-Di Lin,<sup>a</sup> Fa-Kun Zheng,<sup>\*a</sup> Zhi-Fa Liu,<sup>a</sup> Shuai-Hua Wang,<sup>a</sup> Guo-Cong Guo<sup>a</sup> and Jin-Shun Huang<sup>a</sup>

<sup>a</sup> *State Key Laboratory of Structural Chemistry, Fujian Institute of Research on the Structure of Matter, Chinese Academy of Sciences, Fuzhou, Fujian 350002, P. R. China*

<sup>b</sup> *Department of Chemistry, East China University of Science and Technology, Shanghai 200237, P. R. China*

*E-mail: [zfk@fjirsm.ac.cn](mailto:zfk@fjirsm.ac.cn); Fax: +86 591 83714946*

---

\* Author to whom correspondence should be addressed. E-mail: [zfk@fjirsm.ac.cn](mailto:zfk@fjirsm.ac.cn)

**Table S1** Hydrogen-bonded geometry for **1–4**<sup>a</sup>

| D-H...A                  | D-H/Å     | H...A/Å   | D...A/Å    | D-H...A/° |
|--------------------------|-----------|-----------|------------|-----------|
| <b>1</b>                 |           |           |            |           |
| O(1W)-H(1B)...O22_\$1    | 0.79(3)   | 1.98(3)   | 2.772(2)   | 178(3)    |
| O(1W)-H(1A)...O11_\$2    | 0.79(4)   | 2.36(4)   | 3.112(2)   | 160(3)    |
| O(2W)-H(2B)...O22_\$3    | 0.80(2)   | 1.89(3)   | 2.694(2)   | 177(2)    |
| O(2W)-H(2A)...O12_\$4    | 0.81(2)   | 1.97(3)   | 2.7604(18) | 165(2)    |
| <b>2</b>                 |           |           |            |           |
| O(1W)-H(1WA)...N2_\$1    | 0.857(8)  | 2.257(8)  | 3.101(3)   | 168.1(12) |
| O(1W)-H(1WB)...O4_\$2    | 0.859(8)  | 1.957(11) | 2.785(3)   | 161.4(15) |
| <b>3</b>                 |           |           |            |           |
| O(1W)-H(1WA)...O11_\$1   | 0.860(3)  | 2.177(3)  | 2.7998(15) | 129.0(3)  |
| O(1W)-H(1WB)...N13_\$2   | 0.858(3)  | 2.500(6)  | 3.0501(15) | 122.7(5)  |
| O(2W)-H(2WA)...O11_\$3   | 0.860(2)  | 2.094(5)  | 2.7571(14) | 133.5(5)  |
| O(2W)-H(2WB)...O1W_\$4   | 0.861(2)  | 2.413(2)  | 3.2450(15) | 162.8(3)  |
| O(2W)-H(2WB)...O13_\$5   | 0.861(2)  | 2.427(13) | 2.8726(16) | 112.8(11) |
| <b>4</b>                 |           |           |            |           |
| O(1W)-H(1WA)...O13_\$1   | 0.859(10) | 1.929(14) | 2.775(3)   | 168(4)    |
| O(1W)-H(1WB)...O(7W)     | 0.861(10) | 1.870(17) | 2.691(5)   | 159(4)    |
| O(2W)-H(2WA)...O15_\$2   | 0.854(10) | 2.44(3)   | 3.107(4)   | 136(4)    |
| O(2W)-H(2WA)...O(7W)_\$2 | 0.854(10) | 2.39(4)   | 2.993(5)   | 128(4)    |
| O(2W)-H(2WB)...O15       | 0.859(10) | 1.962(11) | 2.815(3)   | 172(4)    |
| O(3W)-H(3WA)...O15_\$3   | 0.854(10) | 1.904(12) | 2.752(3)   | 172(4)    |
| O(3W)-H(3WB)...O11_\$4   | 0.858(10) | 2.071(13) | 2.919(3)   | 170(3)    |
| O(4W)-H(4WA)...O13_\$3   | 0.848(10) | 1.905(13) | 2.743(3)   | 169(4)    |
| O(4W)-H(4WB)...O11       | 0.852(10) | 1.909(15) | 2.721(3)   | 159(3)    |
| O(5W)-H(5WA)...O14_\$5   | 0.854(10) | 1.838(12) | 2.679(3)   | 168(3)    |
| O(5W)-H(5WB)...O14_\$6   | 0.853(10) | 1.854(11) | 2.701(3)   | 172(3)    |

|                         |           |           |          |        |
|-------------------------|-----------|-----------|----------|--------|
| O(6W)-H(6WA)···O11_§7   | 0.855(10) | 2.026(12) | 2.876(3) | 173(4) |
| O(6W)-H(6WB)···O(5W)_§8 | 0.852(10) | 2.008(11) | 2.856(3) | 174(4) |
| O(7W)-H(7WA)···O13_§9   | 0.865(10) | 2.23(3)   | 3.008(4) | 150(5) |

<sup>a</sup> Symmetry codes for **1**: §1  $-x + 1/2, y - 1/2, -z + 1/2$ ; §2  $-x + 1, -y + 1, -z + 1$ ; §3  $-x + 1/2, -y + 3/2, -z$ ; §4  $-x + 1, y - 1, -z + 1/2$ ; for **2**: §1  $-x + 1/2, y + 1/2, -z + 3/2$ ; §2  $x - 1/2, y + 1/2, z$ ; for **3**: §1  $x, -y + 3/2, z - 1/2$ ; §2  $x - 1, y, z$ ; §3  $x, -y + 3/2, z + 1/2$ ; §4  $x, y, z + 1$ ; §5  $-x + 1, -y + 2, -z + 1$ ; for **4**: §1  $-x + 1, -y + 2, -z$ ; §2  $-x, -y + 2, -z + 1$ ; §3  $x, y - 1, z$ ; §4  $-x + 1, -y, -z$ ; §5  $-x + 1, -y + 1, -z$ ; §6  $x, y, z + 1$ ; §7  $x, y + 1, z + 1$ ; §8  $x, y + 1, z$ ; §9  $-x, -y + 2, -z$ .

---

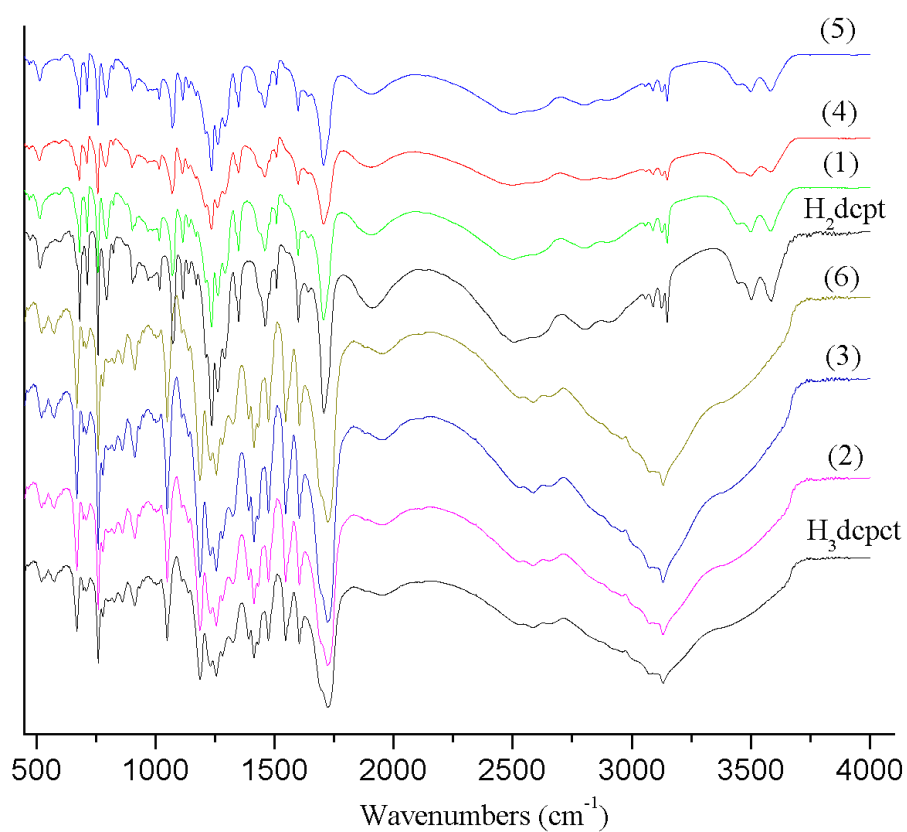

**Fig. S1** IR spectra of H<sub>3</sub>dcpet, H<sub>2</sub>dcpet and the products of reactions (1)–(6) in Scheme 2 (see the text).

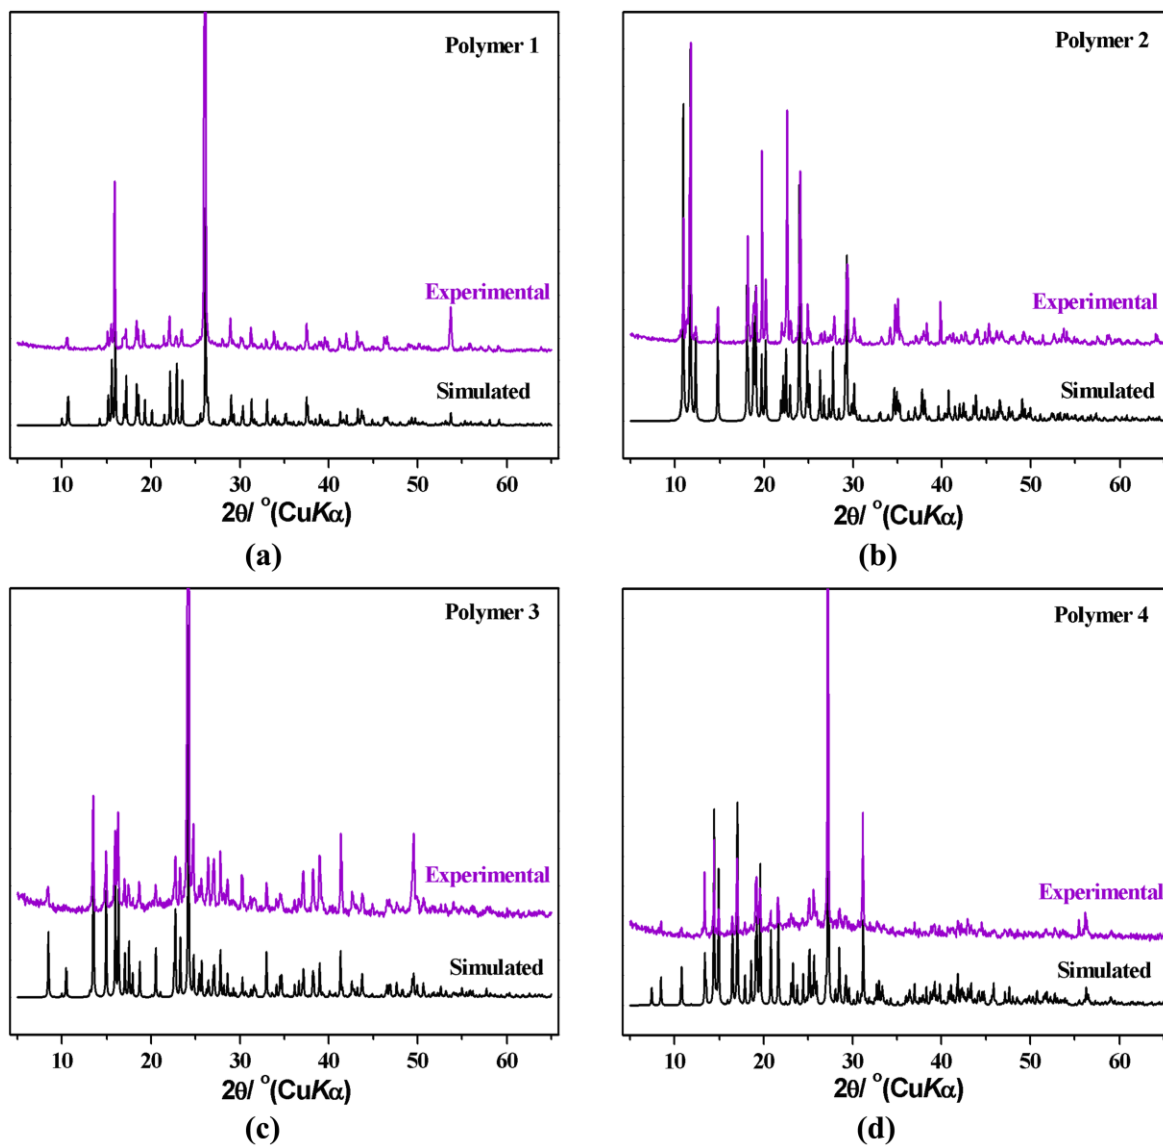

**Fig. S2** Powdered X-ray diffraction (PXRD) patterns of **1** (a), **2** (b), **3** (c) and **4** (d).

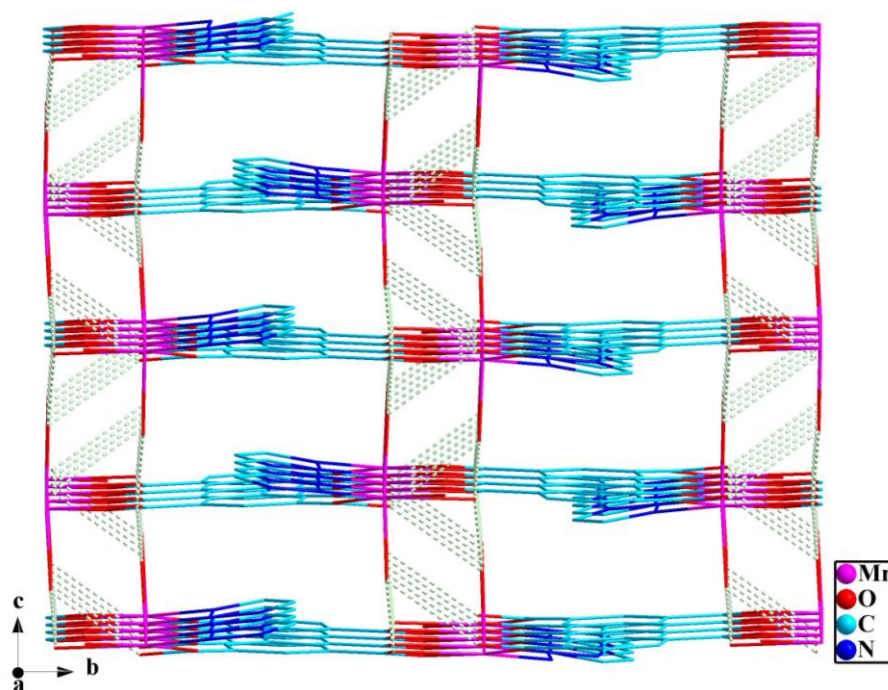

**Fig. S3** 3-D structure of **1** connected by hydrogen bonds viewed along the *a* direction.

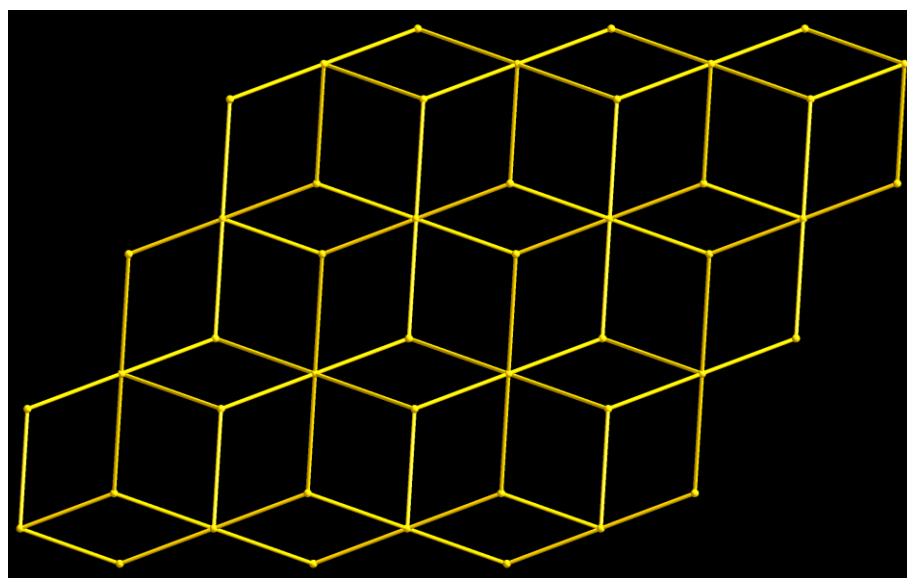

**Fig. S4** A schematic representation of the 2-D CdCl<sub>2</sub> net in **2**.

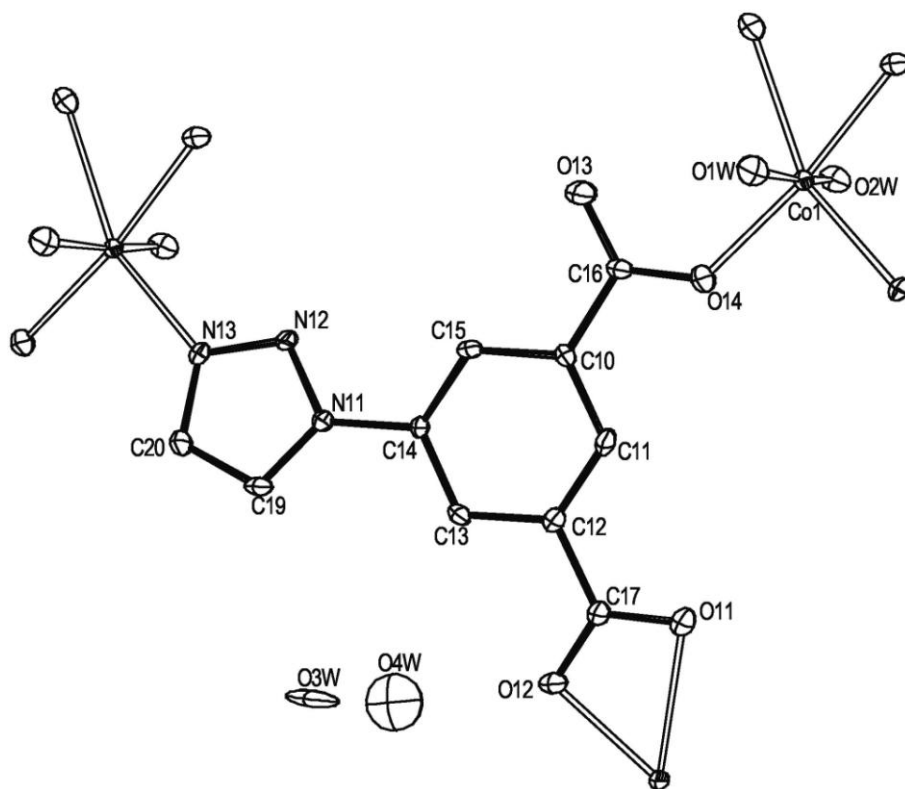

**Fig. S5** ORTEP representation of **3** with thermal ellipse at the 30% probability level. Hydrogen atoms are omitted for clarity.

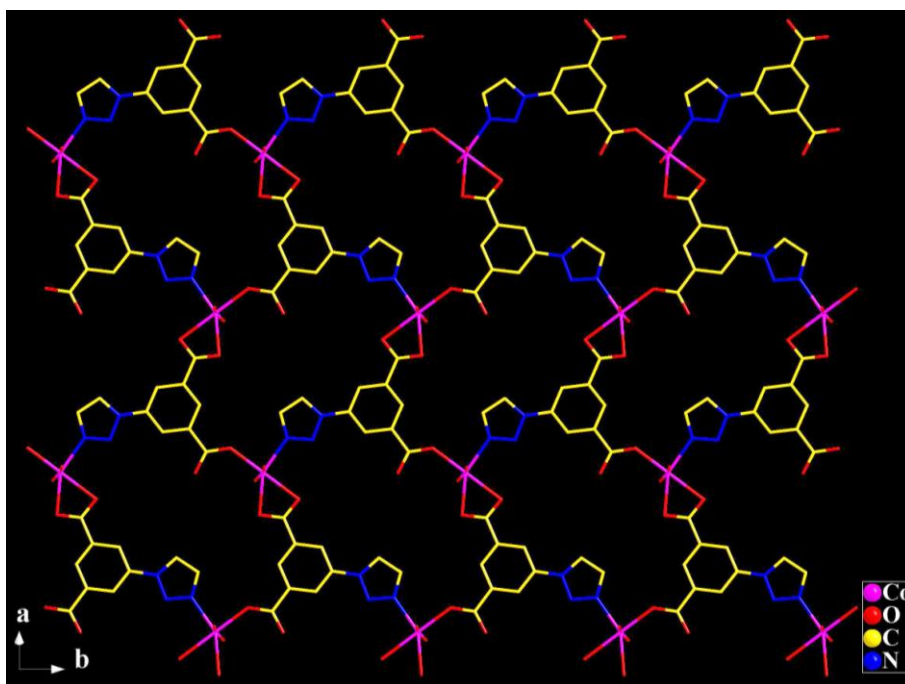

**Fig. S6** The 2-D layered structure of **3** linked by  $\text{dcpt}^{2-}$  ligands.

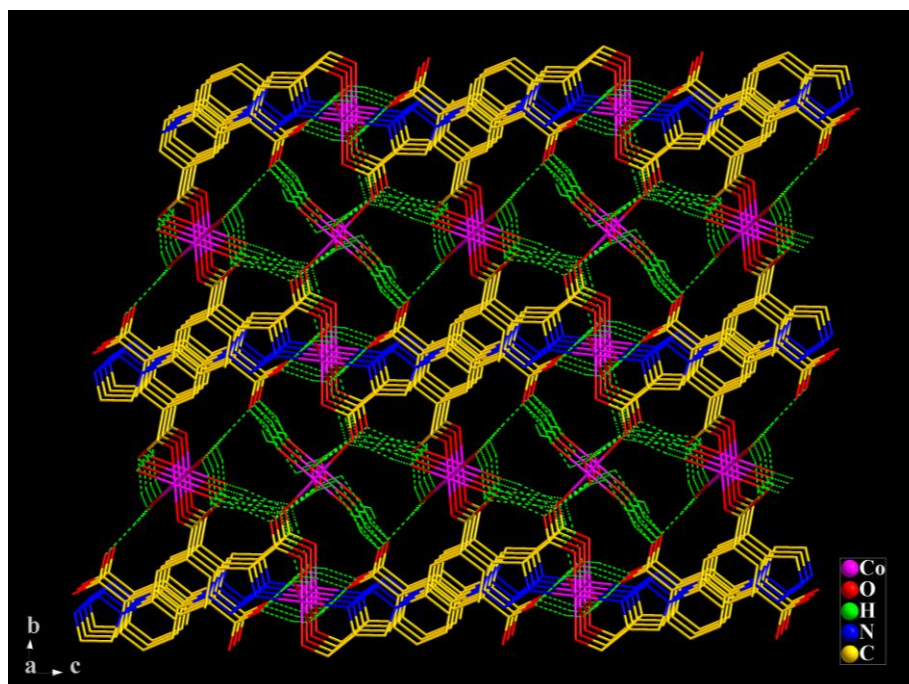

**Fig. S7** 3-D structure of **4** connected by hydrogen bonds viewed along the *a* direction.



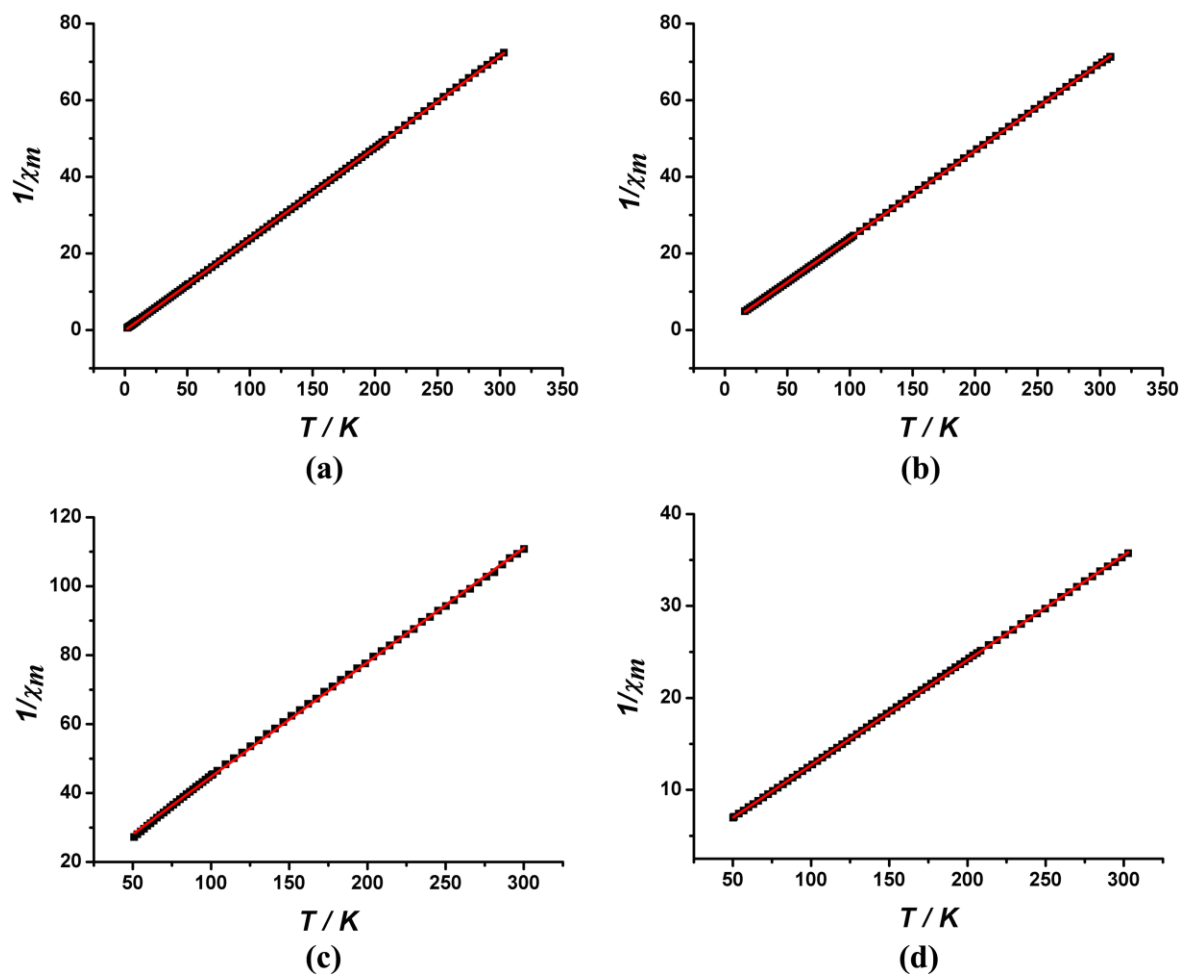

**Fig. S8** A linear fit via Curie-Weiss law  $1/\chi_M = (T - \theta)/C$  in the temperature range of 2–300K for **1** (a), 16–300K for **2** (b), 50–300K for **3** (c) and 50–300K for **4** (d).
